# Supplementary material for: Influence of current collector electrode on the capacitive performance of electrodeposited PANI: insight gained from frequency and time domain analysis
Source: Royal Society of Chemistry journal article supplement (doi:10.1039/c4ra09277e), 2014-01-01
Supplement: c4ra09277e1.pdf [file c4ra09277e1.pdf]

## Electronic Supplementary Information

### *Influence of current collector electrode on the capacitive performance of electrodeposited PANI: insight gained from frequency and time domain analysis*

*Kavita Pandey, Pankaj Yadav, Indrajit Mukhopadhyay\**

School of Solar Energy, Pandit Deendayal Petroleum University, Gandhinagar- 382007, Gujarat,  
India

#### **Image analysis by ImageJ software**

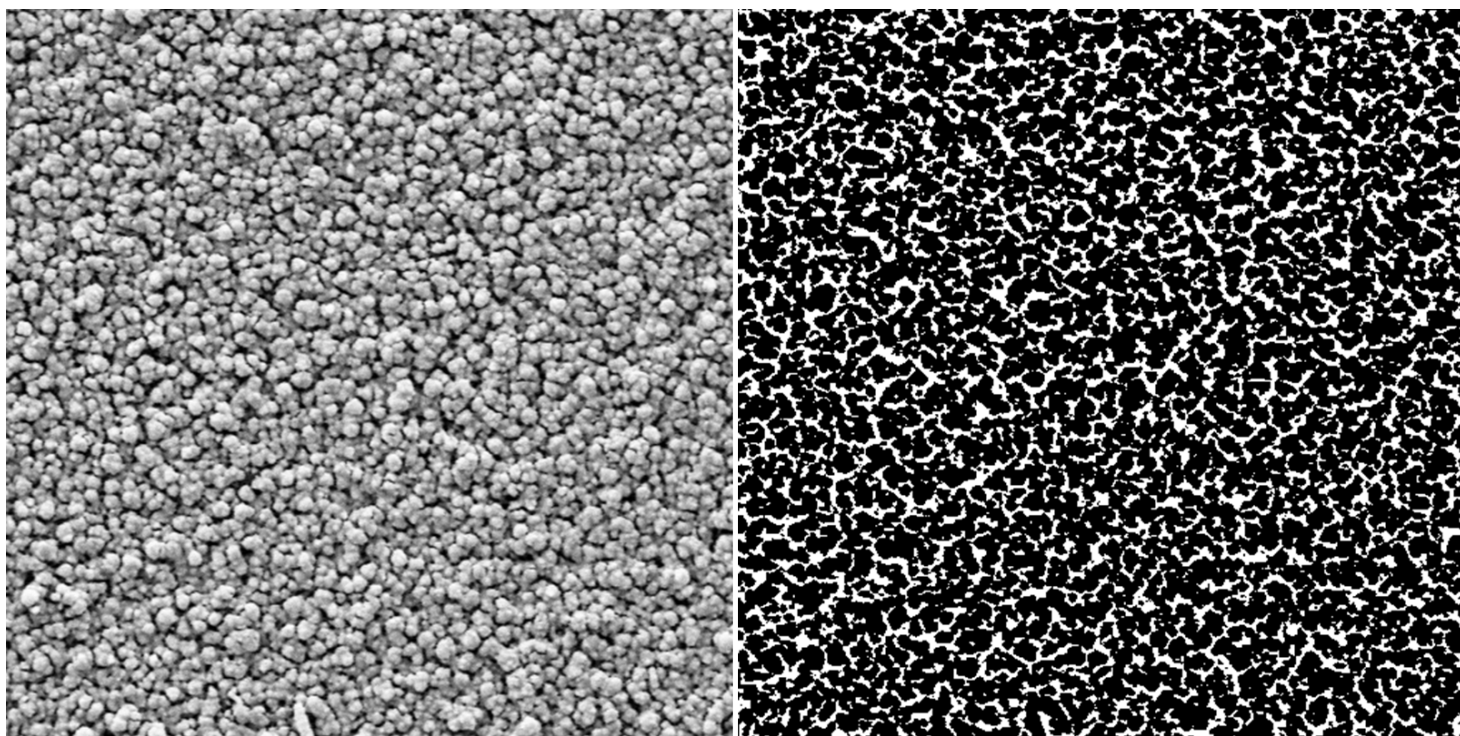

**SI Figure S1:** Calculation of approximate porosity for the Pt/PANI electrode obtained by electropolymerization.

Grey scale: 8 bit; Total Pixels: 262144; Black Pixels: 318583; White Pixels: 69513

Pixel Area =  $0.0112 \times 0.0112$  sq. $\mu\text{m}$ ; Field of View Area = 32.88 sq. $\mu\text{m}$

White area (approximate area unoccupied) = 8.71 sq. $\mu\text{m}$ ; % porosity =  $\sim 26.5\%$

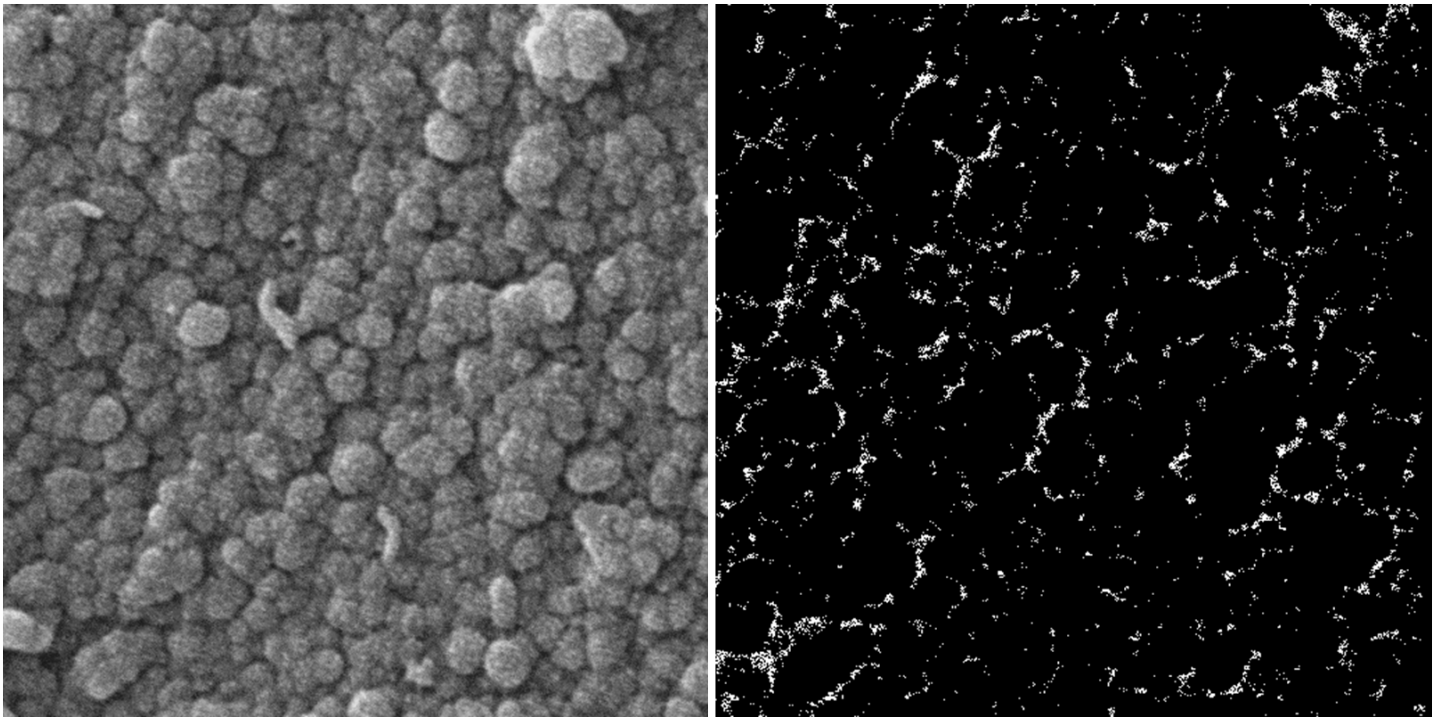

**SI Figure S2:** Calculation of approximate porosity for the F:SnO<sub>2</sub>/PANI electrode obtained by electropolymerization.

Grey scale: 8 bit; Total Pixels: 262144; Black Pixels: 379159; White Pixels: 8937

Pixel Area =  $0.0123 \times 0.0123$  sq. $\mu\text{m}$ ; Field of View Area = 39.65 sq. $\mu\text{m}$

White area (approximate area unoccupied) = 1.35 sq. $\mu\text{m}$ ; % porosity =  $\sim 3.4\%$

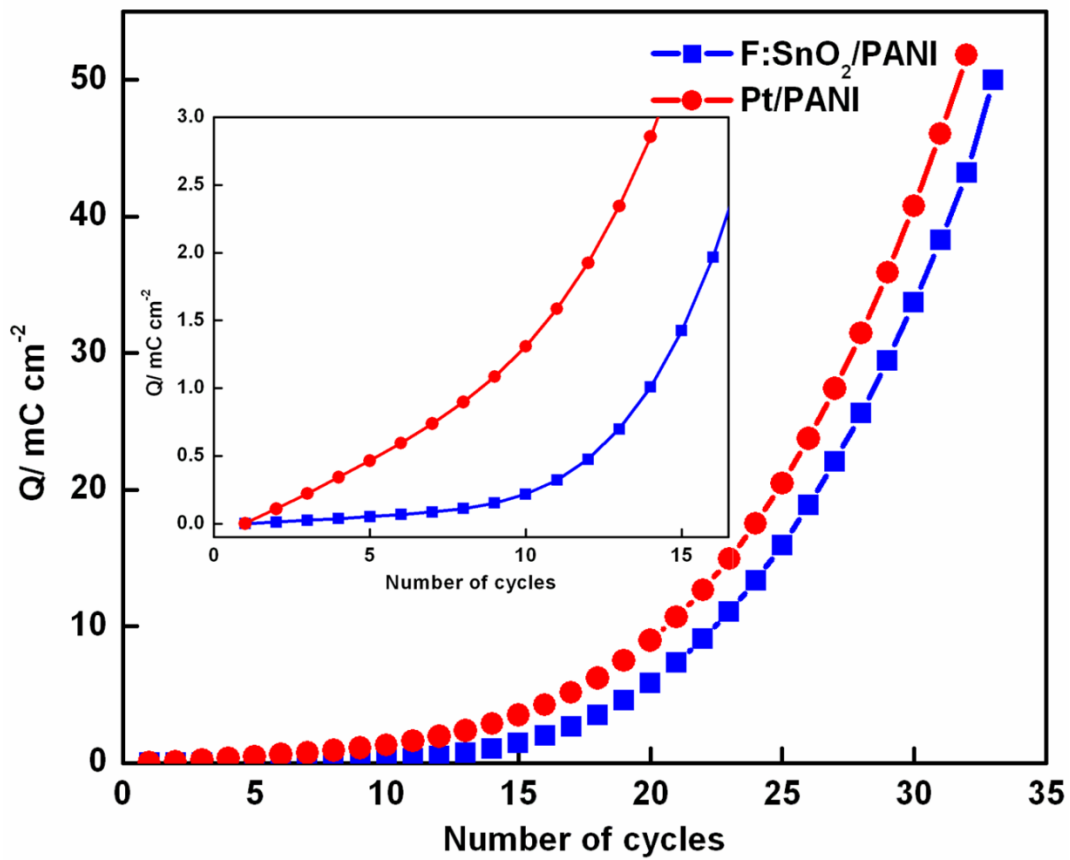

**SI Figure S3:** Anodic charge density for PANI deposition as a function of number of cycles. Inset shows the different rate of PANI deposition at lower number of sweep cycles.
